# Supplementary material
Source: ML conference proceedings conference paper supplement (https://proceedings.neurips.cc/paper_files/paper/2021/hash/def130d0b67eb38b7a8f4e7121ed432c-Abstract.html)
Supplement: Supplementary file 1 [file def130d0b67eb38b7a8f4e7121ed432c-Supplemental.pdf]

## Checklist

1. For all authors...
  - (a) Do the main claims made in the abstract and introduction accurately reflect the paper's contributions and scope? [Yes]
  - (b) Did you describe the limitations of your work? [Yes] Limitations are discussed in Section 6 and in the conclusion.
  - (c) Did you discuss any potential negative societal impacts of your work? [No] The present article stems from the authors' work on anomaly detection in industrial settings. Business applications include monitoring industrial machines, sales data or IoT data. It is our hope that better anomaly detection will lead to benefits such as waste reduction, reduction of emission through improve transportation costs and optimisation of energy consumption.
  - (d) Have you read the ethics review guidelines and ensured that your paper conforms to them? [Yes]
2. If you are including theoretical results...
  - (a) Did you state the full set of assumptions of all theoretical results? [Yes]
  - (b) Did you include complete proofs of all theoretical results? [Yes]
3. If you ran experiments...
  - (a) Did you include the code, data, and instructions needed to reproduce the main experimental results (either in the supplemental material or as a URL)? [Yes] We will submit our code as part of the supplemental material. After the review period, we plan to open-source the code, but not before in order to not break anonymity of the submission.
  - (b) Did you specify all the training details (e.g., data splits, hyperparameters, how they were chosen)? [Yes]
  - (c) Did you report error bars (e.g., with respect to the random seed after running experiments multiple times)? [Yes]
  - (d) Did you include the total amount of compute and the type of resources used (e.g., type of GPUs, internal cluster, or cloud provider)? [Yes]
4. If you are using existing assets (e.g., code, data, models) or curating/releasing new assets...
  - (a) If your work uses existing assets, did you cite the creators? [Yes] Our work does not make use of existing assets.
  - (b) Did you mention the license of the assets? [No] We are releasing the code in the supplementary material without license for reviewing purposes only. We will open-source the code with an Apache 2.0 license after the review period.
  - (c) Did you include any new assets either in the supplemental material or as a URL? [Yes] We will submit the code with the supplementary materials and only later open-source it (not before, in order not to break anonymity of the submission).
  - (d) Did you discuss whether and how consent was obtained from people whose data you're using/curating? [N/A]
  - (e) Did you discuss whether the data you are using/curating contains personally identifiable information or offensive content? [N/A] These are numerical time series in an aggregated fashion so this does not apply.
5. If you used crowdsourcing or conducted research with human subjects...
  - (a) Did you include the full text of instructions given to participants and screenshots, if applicable? [N/A]
  - (b) Did you describe any potential participant risks, with links to Institutional Review Board (IRB) approvals, if applicable? [N/A]
  - (c) Did you include the estimated hourly wage paid to participants and the total amount spent on participant compensation? [N/A]

## A Supplementary experiments.

### A.1 Comparison to fixed thresholds

A standard practice in anomaly detection to classify observations is to use a fixed threshold, either over the data itself or over a model-assigned score. In probabilistic anomaly detection, this corresponds to deciding on a  $p$ -value below which the null hypothesis is rejected. As we argued above, such procedure controls the probability of a false discovery for each individual test but does not provide any control over the whole sequence.

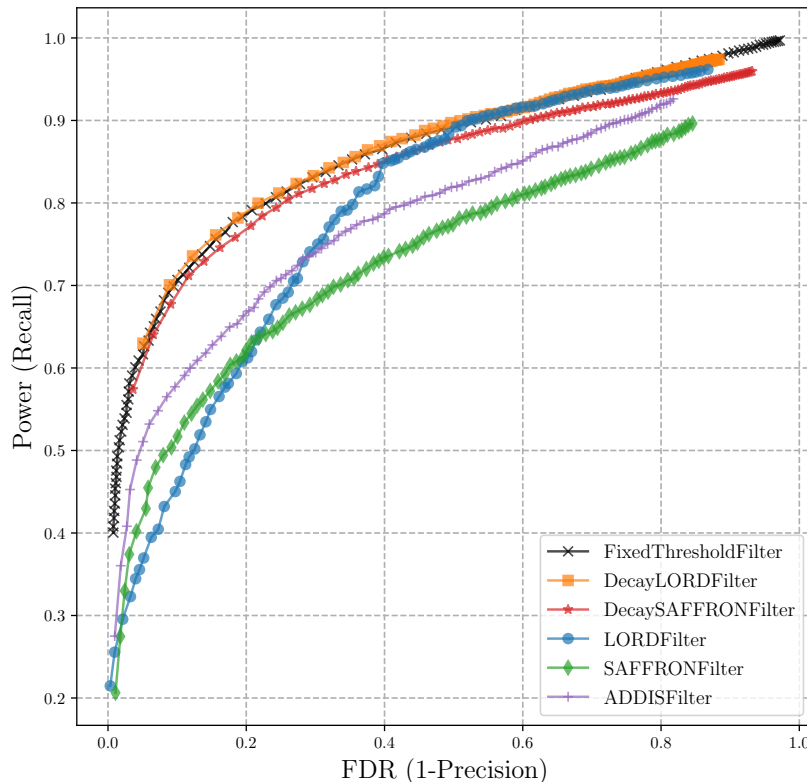

Figure 5: Power (recall) and FDR ( $1 - \text{precision}$ ) for false discovery control rules as well as fixed threshold. The data generating process is the same as in Figure 2

Figure 5 shows that our decay FDRC rules do draw a similar Precision-Recall curve as the fixed threshold approach does. The major difference between both approaches is that FDRC rules allow users to specify the precision target ex-ante while this is not possible with fixed threshold. Non-decay rules achieve lower recall for a given precision level than both decay FDRC and fixed thresholds on at least part of the precision range.

## B Discussion about SAFFRON and ADDIS.

### B.1 Standard algorithms

In this section we discuss briefly some of the details in the definitions of SAFFRON and ADDIS [19, 30]. The algorithm LORD cannot be seen as a special case of SAFFRON. However SAFFRON is a

special case of ADDIS as will be presented below. Given two sequences  $\{\lambda_t\}_{t=1}^\infty$  and  $\{\tau_t\}_{t=1}^\infty$  we define the indicators

$$C_t = \mathbf{1}\{p_t \leq \lambda_t\} \quad \text{and} \quad K_t = \mathbf{1}\{p_t \leq \tau_t\}.$$

We define the filtration

$$\mathcal{F}^t \triangleq \sigma(R_1, \dots, R_t, C_1, \dots, C_t, K_1, \dots, K_t)$$

and require sequences  $\{\alpha_t\}_{t=1}^\infty, \{\lambda_t\}_{t=1}^\infty, \{\tau_t\}_{t=1}^\infty$  to be predictable, that is,  $\alpha_t, \lambda_t, \tau_t \in \mathcal{F}^{t-1}$ . They must also satisfy the inequality  $\tau_t > \lambda_t \geq \alpha_t$  for all  $t$ .

The ADDIS oracle is given by

$$\widehat{\text{FDP}}_{\text{ADDIS}}(T) = \frac{\sum_{t \leq T} \alpha_t \frac{\mathbf{1}\{\lambda_t < p_t \leq \tau_t\}}{\tau_t - \lambda_t}}{R(T) \vee 1},$$

and SAFFRON can be seen as a special case of ADDIS where  $\tau_t = 1$  for all  $t$ , that is,

$$\widehat{\text{FDP}}_{\text{SAFFRON}}(T) = \frac{\sum_{t \leq T} \alpha_t \frac{\mathbf{1}\{\lambda_t < p_t\}}{1 - \lambda_t}}{R(T) \vee 1}.$$

The FDR is controlled at time  $T$  if  $\widehat{\text{FDP}}_{\text{ADDIS}}(T) \leq \alpha$ .

A special instance of this algorithm can be derived as follows. We let

$$S_j(t) \triangleq \mathbf{1}\{t > \rho_j\} + \sum_{i=\rho_j+1}^{t-1} \mathbf{1}\{\lambda < p_i \leq \tau\},$$

where  $\rho_0 = -\infty$  and define

$$\alpha_t = (\tau - \lambda) \left( w_0 (\gamma_{S_0(t)} - \gamma_{S_1(t)}) + \alpha \sum_j \gamma_{S_j(t)} \right) \wedge \lambda$$

for some  $w_0 \in (0, \alpha)$ .

In practice, the sequences  $\{\lambda_t\}_{t=1}^\infty$  and  $\{\tau_t\}_{t=1}^\infty$  are often chosen to be constant. Typical values are  $\lambda_t = 1/2$  for SAFFRON and  $\lambda_t = 1/4, \tau_t = 1/2$  for ADDIS; they are the ones we choose in our experiments. The sequence  $\{\gamma_t\}_{t=1}^\infty \gamma_t \propto t^{-s}$  for both SAFFRON and ADDIS, where  $s = 1.6$  unless otherwise specified.

## B.2 Memory decay algorithms

For the memory decay versions controlling  $\text{sFDR}_\delta$  we define the oracle

$$\widehat{\text{FDP}}_{\text{ADDIS}}^\delta(T) = \frac{\sum_{t \leq T} \delta^{T-t} \alpha_t \frac{\mathbf{1}\{\lambda_t < p_t \leq \tau_t\}}{\tau_t - \lambda_t}}{R_\delta(T) + \eta},$$

and have the following result.

**Proposition 3.** *Suppose that quantities  $\alpha_t, \lambda_t$  and  $1 - \tau_t$  are coordinatewise non-decreasing functions of the past satisfying  $\tau_t > \lambda_t \geq \alpha_t$  for all  $t$ . If  $p$ -values satisfy relation [3](#) then picking decision thresholds  $\alpha_t$  such that  $\widehat{\text{FDP}}_{\text{ADDIS}}^\delta(T) \leq \alpha$  at time  $T$  ensures that  $\text{sFDR}_\delta(T) \leq \alpha$ .*

Proof is given in Appendix [C.3](#). For some fixed parameters  $\tau > \lambda$  we can define the following special instance:

$$\alpha_t = \alpha(\tau - \lambda) \left( \eta \tilde{\gamma}_{S_0(t)} + \sum_j \delta^{t-\rho_j} \gamma_{S_j(t)} \right) \wedge \lambda.$$

In Appendix [D](#) we show how to adapt the statements in order to control the standard memory decay FDR.

## C Omitted proofs

Our proofs are based on the two following lemmas, proposed by [18] and [30].

**Lemma C.1** ([18]). *Suppose that the sequence  $\{p_t\}_{t=1}^{\infty}$  is composed of independent  $p$ -values. Let  $f_t$  be a sequence of non-decreasing functions such that  $\alpha_t = f_t(R_1, \dots, R_{t-1})$ . Then for any non-decreasing function  $h$ ,*

$$\mathbf{E} \left[ \frac{\alpha_t}{h(R_{1:T})} \mid \mathcal{F}^{t-1} \right] \geq \mathbf{E} \left[ \frac{\mathbf{1}\{p_t \leq \alpha_t\}}{h(R_{1:T})} \mid \mathcal{F}^{t-1} \right],$$

where  $\mathcal{F} = \sigma(R_1, \dots, R_t)$ .

**Lemma C.2** ([30]). *Suppose that the sequence  $\{p_t\}_{t=1}^{\infty}$  is composed of independent  $p$ -values. let  $f_t, g_t, \tilde{g}_t$  be three sequences of non-decreasing functions such that  $\alpha_t = f_t(R_{1:t-1}, C_{1:t-1}, K_{1:t-1})$ ,  $\lambda_t = g_t(R_{1:t-1}, C_{1:t-1}, K_{1:t-1})$ ,  $\tau_t = \tilde{g}_t(R_{1:t-1}, C_{1:t-1}, K_{1:t-1})$  and  $\alpha_t \leq \lambda_t < \tau_t$ . Then for any non-decreasing function  $h$ ,*

$$\begin{aligned} \mathbf{E} \left[ \frac{\alpha_t \mathbf{1}\{\lambda_t < p_t \leq \tau_t\}}{(\tau_t - \lambda_t)h(R_{1:T})} \mid \mathcal{F}^{t-1}, K_t = 1 \right] &\geq \mathbf{E} \left[ \frac{\alpha_t}{\tau_t h(R_{1:T})} \mid \mathcal{F}^{t-1}, K_t = 1 \right] \\ &\geq \mathbf{E} \left[ \frac{\mathbf{1}\{p_t \leq \alpha_t\}}{h(R_{1:T})} \mid \mathcal{F}^{t-1}, K_t = 1 \right], \end{aligned}$$

where  $\mathcal{F}^t = \sigma(R_1, \dots, R_t, C_1, \dots, C_t, K_1, \dots, K_t)$ .

Detailed proofs of these lemma may be found in [18] and [30].

At all times  $T$  we have

$$\begin{aligned} \text{sFDR}_{\delta}(T) &= \mathbf{E} \left[ \frac{V_{\delta}(T)}{R_{\delta}(T) + \eta} \right] \\ &= \mathbf{E} \left[ \sum_{t=1}^T \frac{\delta^{T-t} R_t \mathbf{1}\{t \in \mathcal{H}^0\}}{R_{\delta}(T) + \eta} \right] \\ &\leq \mathbf{E} \left[ \sum_{t=1}^T \frac{\delta^{T-t} R_t}{R_{\delta}(T) + \eta} \right]. \end{aligned} \tag{11}$$

So if we prove that the sum in the expectation is less than  $\alpha$  at time  $T$  then the  $\text{sFDR}_{\delta}(T)$  is controlled. We show below that this is the case for LORD, SAFFRON and ADDIS. To do so, we let  $\mathcal{R}(T) = \{t \in [T] \mid R_t = 1\}$  denote the set containing the times of rejections until step  $T$ .

### C.1 Proof of Proposition 1

The mapping  $h(R_{1:T}) = \sum_{t=1}^T \delta^{T-t} R_t + \eta$  is coordinate-wise non-decreasing. If we use it to apply Lemma C.1 to the quantity in Inequality (11) we find that

$$\begin{aligned} \text{sFDR}_{\delta}(T) &\leq \mathbf{E} \left[ \sum_{t=1}^T \frac{\delta^{T-t} \alpha_t}{R_{\delta}(T) + \eta} \right] \\ &= \mathbf{E} \left[ \widehat{\text{FDR}}_{\text{LORD}}^{\delta}(T) \right]. \end{aligned}$$

This shows that if the thresholds are chosen such that  $\widehat{\text{FDR}}_{\text{LORD}}^{\delta}(T) \leq \alpha$  at time  $T$  then  $\text{sFDR}_{\delta}$  is controlled.

Let us now show that the special instance

$$\alpha_t = \alpha \eta \tilde{\gamma}_t + \alpha \sum_j \delta^{t-\rho_j} \gamma_{t-\rho_j}$$

satisfies this property. This is equivalent to show that the quantity

$$P(T) = \alpha(R_{\delta}(T) + \eta) - \sum_{t=1}^T \delta^{T-t} \alpha_t$$

is non-negative for all  $T$ . We find that

$$\begin{aligned}
P(T) &= \alpha \left( \sum_{t=1}^T \delta^{T-t} R_t + \eta \right) - \alpha \sum_{t=1}^T \left( \delta^{T-t} \eta \tilde{\gamma}_t + \sum_j \delta^{t-\rho_j} \gamma_{t-\rho_j} \right) \\
&= \alpha \eta \left( 1 - \sum_{t=1}^T \delta^{T-t} \tilde{\gamma}_t \right) + \alpha \sum_{t \in \mathcal{R}(T)} \delta^{T-t} \left( 1 - \sum_{j=1}^{T-t} \gamma_j \right) \\
&\geq 0,
\end{aligned}$$

where the inequality comes from the fact that  $\{\gamma_t\}_{t=1}^\infty$  sums to 1 and that  $\sum_{t=1}^T \delta^{T-t} \tilde{\gamma}_t \leq 1$ .

## C.2 Proof of proposition 2

We let  $\mathcal{G}^t = \sigma(R_1, \dots, R_{t-L})$  denote the non-conflicting filtration, *i.e.*, the information known at time  $t$  which is not in conflict with the current  $p$ -value (it is indeed a filtration because  $t-L$  is non-decreasing). In particular  $\alpha_t$  is measurable with respect to  $\mathcal{G}^{t-1}$ . We write the oracle here again for convenience:

$$\widehat{\text{FDP}}_{\text{dep}}^\delta(T) = \frac{\sum_{t \leq T} \delta^{T-t} \alpha_t}{R_\delta(T) + \eta}.$$

The proof is essentially based on the analysis in [34]. We have

$$\begin{aligned}
\mathbf{E}[V_\delta(T)] &= \mathbf{E} \left[ \sum_{t=1}^T \delta^{T-t} R_t \mathbf{1}\{t \in \mathcal{H}^0\} \right] \\
&\leq \mathbf{E} \left[ \sum_{t=1}^T \delta^{T-t} R_t \right] \\
&= \sum_{t=1}^T \delta^{T-t} \mathbf{E}[R_t] \\
&= \sum_{t=1}^T \delta^{T-t} \mathbf{E}[\mathbf{E}[R_t \mid \mathcal{G}^{t-1}]] \\
&\leq \sum_{t=1}^T \delta^{T-t} \mathbf{E}[\alpha_t] \\
&= \mathbf{E} \left[ \sum_{t=1}^T \delta^{T-t} \alpha_t \right],
\end{aligned}$$

where we used the fact that  $R_t$  is  $\mathcal{G}^{t-1}$  measurable.

Now assume that  $\widehat{\text{FDP}}_{\text{dep}}^\delta(T) \leq \alpha$ . It follows that

$$\mathbf{E}[V_\delta(T)] \leq \alpha \mathbf{E}[R_\delta(T) + \eta]$$

and we conclude that  $\text{mFDR}_\delta(T) \leq \alpha$ .

Let us now show that the special instance

$$\alpha_t = \alpha \eta \tilde{\gamma}_t + \alpha \sum_j \delta^{t-\rho_j} \gamma_{t-\rho_j-L}.$$

satisfies the above property. This is equivalent to show that the quantity

$$P(T) = \alpha(R_\delta(T) + \eta) - \sum_{t=1}^T \delta^{T-t} \alpha_t$$

is non-negative for all  $T$ . We compute that

$$\begin{aligned}
P(T) &= \alpha \left( \sum_{t=1}^T \delta^{T-t} R_t + \eta \right) - \alpha \sum_{t=1}^T \delta^{T-t} \left( \eta \tilde{\gamma}_t + \sum_j \delta^{t-\rho_j} \gamma_{t-\rho_j-L} \right) \\
&= \alpha \eta \left( 1 - \sum_{t=1}^T \delta^{T-t} \tilde{\gamma}_t \right) + \alpha \sum_{t=1}^T \delta^{T-t} \left( R_t - \sum_j \delta^{t-\rho_j} \gamma_{t-\rho_j-L} \right) \\
&= \alpha \eta \left( 1 - \sum_{t=1}^T \delta^{T-t} \tilde{\gamma}_t \right) + \alpha \sum_{t \in \mathcal{R}(T)} \delta^{T-t} \left( 1 - \sum_{j=1}^{T-t-L} \gamma_j \right) \\
&\geq 0.
\end{aligned}$$

### C.3 Proof of Proposition 3

For ADDIS the filtration is given by  $\mathcal{F}^t = \sigma(R_{1:t}, C_{1:t}, K_{1:t})$ . From Inequality (11) we derive

$$\begin{aligned}
\text{sFDR}_\delta(T) &\leq \mathbf{E} \left[ \sum_{t=1}^T \frac{\delta^{T-t} R_t}{R_\delta(T) + \eta} \right] \\
&= \sum_{t=1}^T \mathbf{E} \left[ \mathbf{E} \left[ \frac{\delta^{T-t} R_t}{R_\delta(T) + \eta} \mid K_t = 1, \mathcal{F}^{t-1} \right] \mathbf{Prob}\{K_t = 1 \mid \mathcal{F}^{t-1}\} \right] \quad (12)
\end{aligned}$$

The mapping  $h(R_{1:T}) = \sum_{t=1}^T \delta^{T-t} R_t + \eta$  is coordinate-wise non-decreasing. If we use it to apply Lemma C.2 to  $\mathbf{E} \left[ \frac{\alpha_t \mathbf{1}\{\lambda_t < p_t \leq \tau_t\}}{(\tau_t - \lambda_t) h(R_{1:T})} \mid \mathcal{F}^{t-1}, K_t = 1 \right]$  Inequality (12) we find

$$\begin{aligned}
\text{sFDR}_\delta(T) &\leq \sum_{t=1}^T \mathbf{E} \left[ \mathbf{E} \left[ \frac{\delta^{T-t} \alpha_t \mathbf{1}\{\lambda_t < p_t \leq \tau_t\}}{(\tau_t - \lambda_t)(R_\delta(T) + \eta)} \mid \mathcal{F}^{t-1}, K_t = 1 \right] \mathbf{Prob}\{K_t = 1 \mid \mathcal{F}^{t-1}\} \right] \\
&= \sum_{t=1}^T \mathbf{E} \left[ \delta^{T-t} \frac{\alpha_t \mathbf{1}\{\lambda_t < p_t \leq \tau_t\}}{(\tau_t - \lambda_t)(R_\delta(T) + \eta)} \right] \\
&= \mathbf{E} \left[ \widehat{\text{FDR}}_{\text{ADDIS}}^\delta(T) \right].
\end{aligned}$$

This shows that if the thresholds are chosen such that  $\widehat{\text{FDR}}_{\text{ADDIS}}^\delta(T) \leq \alpha$  at time  $T$  then the  $\text{sFDR}_\delta(T)$  is controlled.

Let us now show that the special instance

$$\alpha_t = \alpha(\tau - \lambda) \left( \eta \tilde{\gamma}_{S_0(t)} + \sum_j \delta^{t-\rho_j} \gamma_{S_j(t)} \right) \wedge \lambda.$$

satisfies this property, where we define

$$\begin{aligned}
S_j(t) &= \mathbf{1}\{t > \rho_j\} + \sum_{i=\rho_j+1}^{t-1} \mathbf{1}\{\lambda < p_i \leq \tau\} \\
&= \mathbf{1}\{t > \rho_j\} + \sum_{i=\rho_j+1}^{t-1} (1 - C_i) K_i.
\end{aligned}$$

This is equivalent to show that the quantity

$$P(T) = \alpha(R_\delta(T) + \eta) - \sum_{t=1}^T \frac{\delta^{T-t} \alpha_t \mathbf{1}\{\lambda < p_t \leq \tau\}}{(\tau - \lambda)}$$

is non-negative for all  $T$ . We find that

$$\begin{aligned}
P(T) &\geq \alpha \left( \sum_{t=1}^T \delta^{T-t} R_t + \eta \right) - \alpha \sum_{t=1}^T \delta^{T-t} \mathbf{1}\{\lambda < p_t \leq \tau\} (\eta \tilde{\gamma}_{S_0(t)} + \sum_j \delta^{t-\rho_j} \gamma_{S_j(t)}) \\
&= \alpha \eta \left( 1 - \sum_{t=1}^T \delta^{T-t} (1 - C_t) K_t \tilde{\gamma}_{S_0(t)} \right) + \alpha \sum_{t=1}^T \delta^{T-t} \left( R_t - (1 - C_t) K_t \sum_j \delta^{t-\rho_j} \gamma_{S_j(t)} \right) \\
&\geq \alpha \eta \left( 1 - \sum_{t=1}^{S_0(t)} \delta^{T-t} \tilde{\gamma}_t \right) + \alpha \sum_{t \in \mathcal{R}(T)} \delta^{T-t} \left( 1 - \sum_{j=1}^{S_j(t)} \gamma_j \right) \\
&\geq 0.
\end{aligned}$$

Statements for SAFFRON are naturally obtained by setting  $\tau_t = 1$  for all  $t$ .

## D Adapting algorithms to standard FDR

We show here how to adapt the aforementioned algorithms to control the memory decay FDR without smoothing, that is,

$$\text{FDR}_\delta(T) = \mathbf{E} \left[ \frac{V_\delta(T)}{R_\delta(T) \vee 1} \right].$$

To do so we define new oracles where the only difference is the denominator.

**LORD.** For LORD we define the oracle

$$\widehat{\text{FDP}}_{\text{LORD}}^\delta(T) = \frac{\sum_{t \leq T} \delta^{T-t} \alpha_t}{R_\delta(T) \vee 1}.$$

Picking thresholds  $\{\alpha_t\}_{t=1}^\infty$  such that  $\widehat{\text{FDP}}_{\text{LORD}}^\delta(T) \leq \alpha$  ensure that  $\text{FDR}_\delta(T) \leq \alpha$ . The proof for this statement is very similar as the one in Appendix [C.1](#).

As a special instance, we pick  $w_0 \in (0, \alpha)$  and define

$$\alpha_t = w_0 \tilde{\gamma}_t + (\alpha - w_0) \sum_j \delta^{t-\rho_j} \gamma_{t-\rho_j}. \quad (13)$$

We can check that  $\widehat{\text{FDP}}_{\text{LORD}}^\delta(T) \leq \alpha$  at all time  $T$  which shows that  $\text{FDR}_\delta$  is controlled. Notice that the thresholds are lower-bounded by  $w_0(1 - \delta)$ .

**SAFFRON and ADDIS.** For ADDIS we define the oracle

$$\widehat{\text{FDP}}_{\text{ADDIS}}^\delta(T) = \frac{\sum_{t \leq T} \delta^{T-t} \alpha_t \frac{\mathbf{1}\{\lambda_t < p_t \leq \tau_t\}}{\tau_t - \lambda_t}}{R_\delta(T) \vee 1}.$$

Here again, if we pick the threshold such that  $\widehat{\text{FDP}}_{\text{ADDIS}}^\delta(T) \leq \alpha$  then  $\text{FDR}_\delta(T) \leq \alpha$  and the proof is very similar to the one in Appendix [C.3](#).

As a special instance, we pick  $\tau > \lambda$ ,  $w_0 \in (0, \alpha)$  and define

$$\alpha_t = (\tau - \lambda) \left( w_0 \tilde{\gamma}_{S_0(t)} + (\alpha - w_0) \sum_j \delta^{t-\rho_j} \gamma_{S_j(t)} \right) \wedge \lambda.$$

We can check that at any time  $T$ ,

$$\widehat{\text{FDP}}_{\text{ADDIS}}^\delta(T) \leq \alpha$$

which shows that  $\text{FDR}_\delta$  is controlled. Again, SAFFRON is just a special case where  $\tau_t = 1$  for all  $t$ . Thresholds are lower-bounded by  $(\tau - \lambda)w_0(1 - \delta) \wedge \lambda$ .

**Local dependence.** For the local dependency setup we can define the thresholds

$$\alpha_t = w_0 \tilde{\gamma}_t + (\alpha - w_0) \sum_j \delta^{t-\rho_j-L} \gamma_{t-\rho_j-L}.$$
